# Supplementary material for: In Vitro Anticancer Screening, Molecular Docking and Antimicrobial Studies of Triazole-Based Nickel(II) Metal Complexes
Source: MDPI journal article supplement (doi:10.3390/molecules27196548), 2022-10-03
Supplement: s1 [file s1]

## Supporting Information

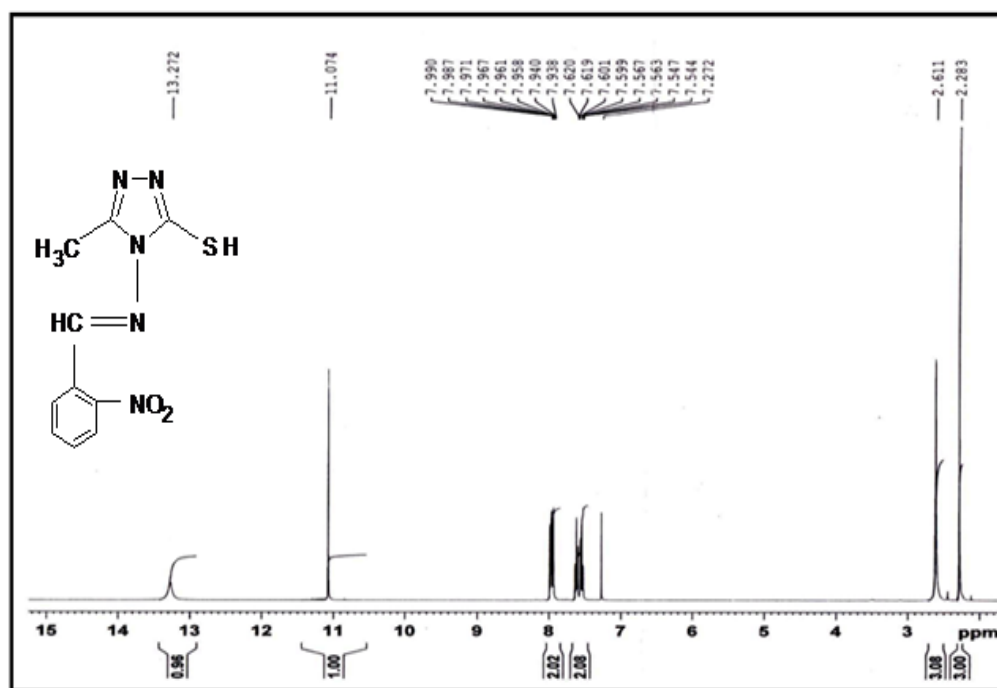

**Figure S1:** <sup>1</sup>H-NMR of HL<sub>1</sub>: 4-(2'-Nitrobenzylideneimino)-3-methyl-5-mercapto-1,2,4-Triazole.

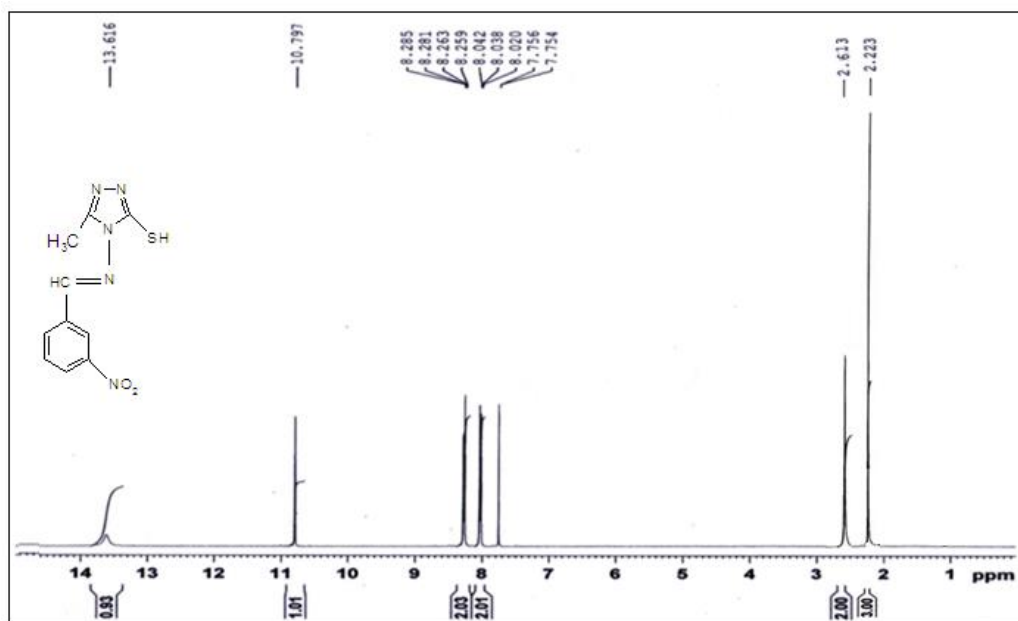

**Figure S2:**  $^1\text{H}$ NMR spectrum of  $\text{HL}_2$  (4-(3'-Nitrobenzylideneimino)-3-methyl-5-mercapto-1,2,4-triazole).

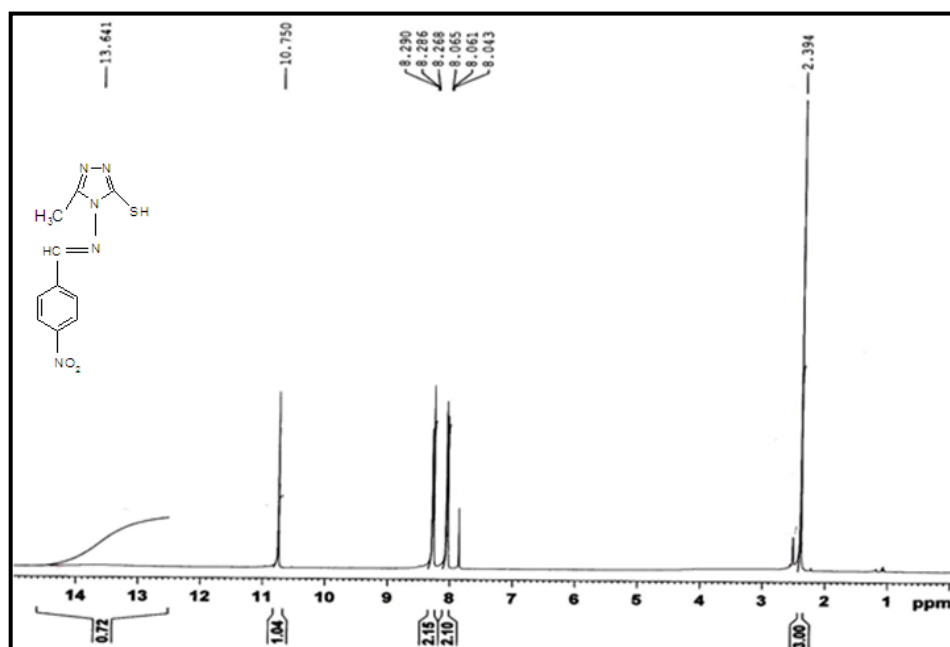

**Figure S3:**  $^1\text{H}$ NMR spectrum of  $\text{HL}_3$  (4-(4'-Nitrobenzylideneimino)-3-methyl-5-mercapto-1,2,4-triazole).

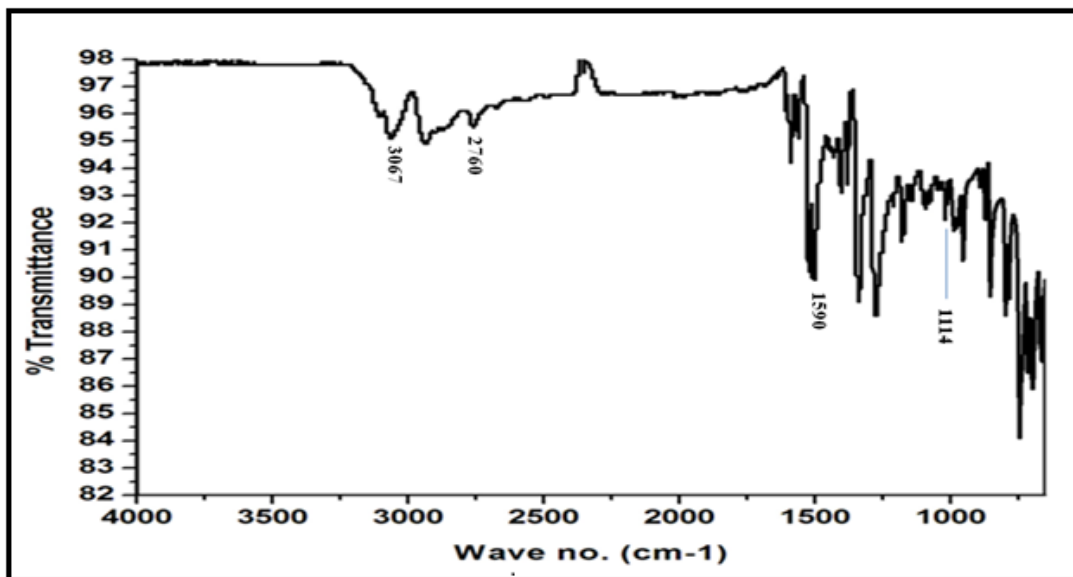

(a)

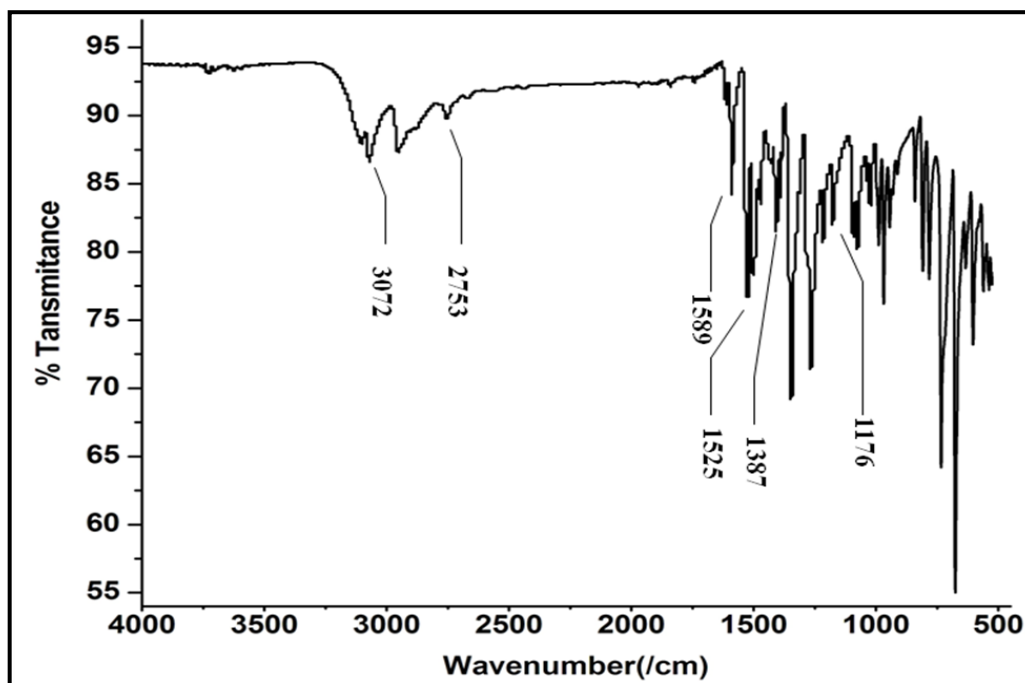

(b)

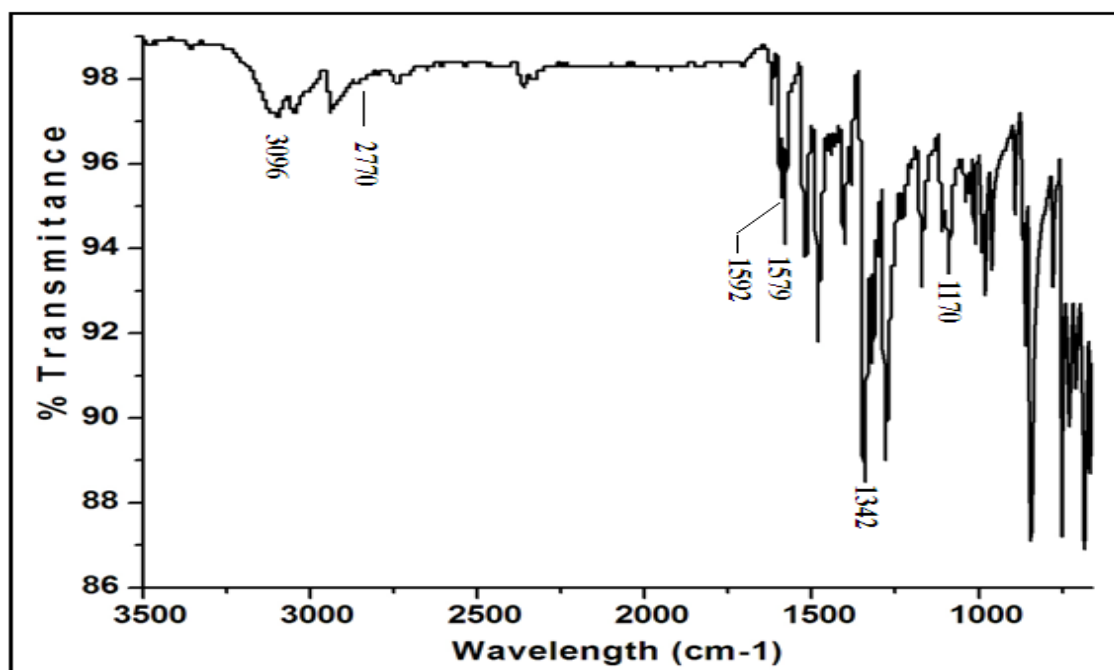

(c)

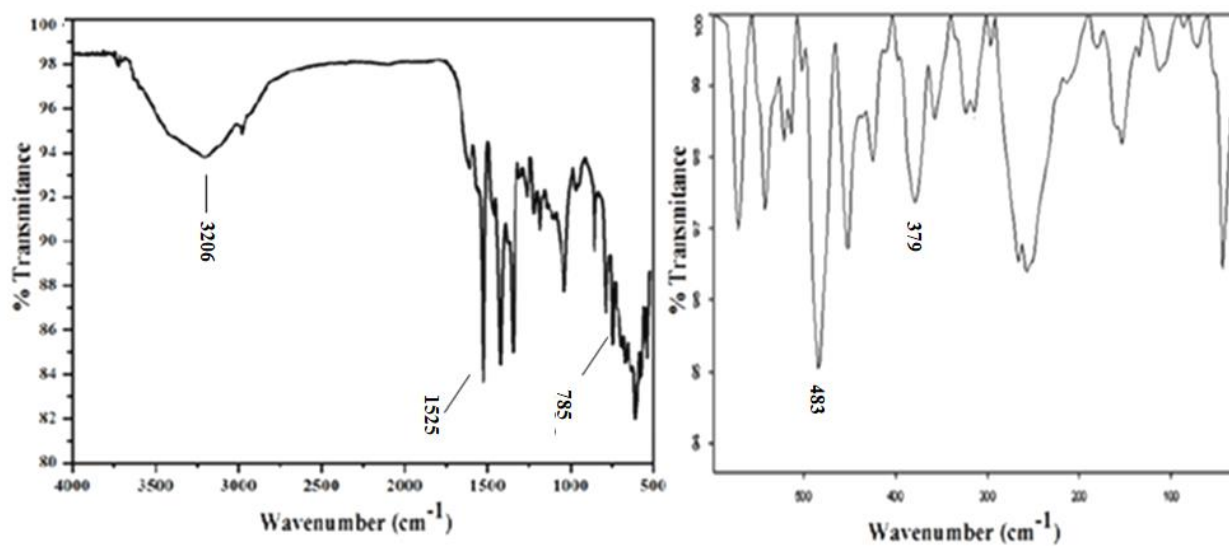

(d)

**Figure S4:** FT-IR spectra of (a) HL<sub>1</sub>, (b) HL<sub>2</sub>, (c) HL<sub>3</sub> and (d) complex C<sub>1</sub>.

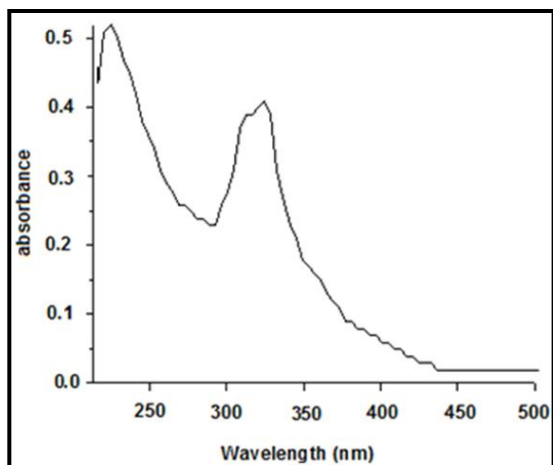

(a)

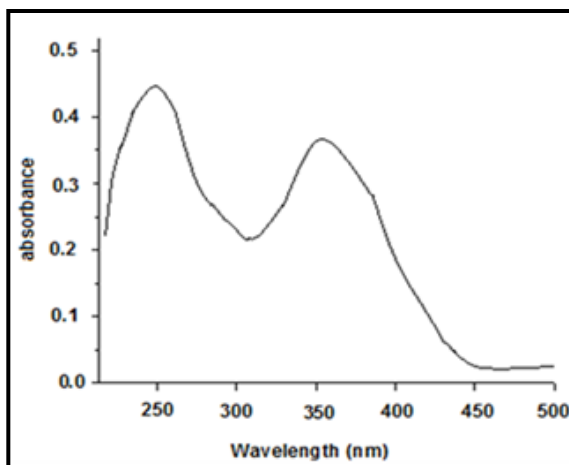

(b)

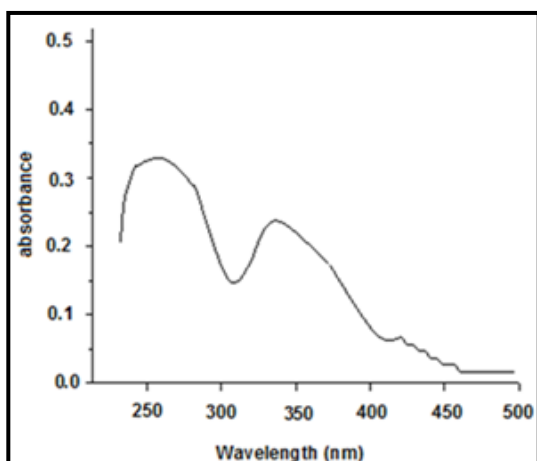

(c)

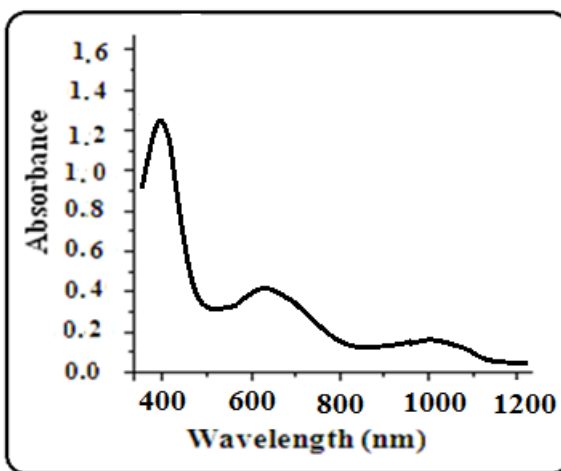

(d)

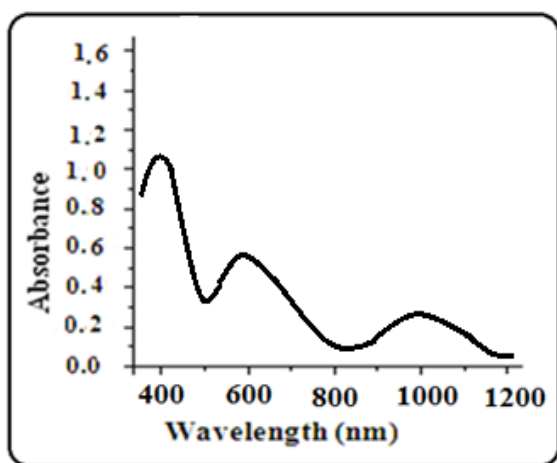

(e)

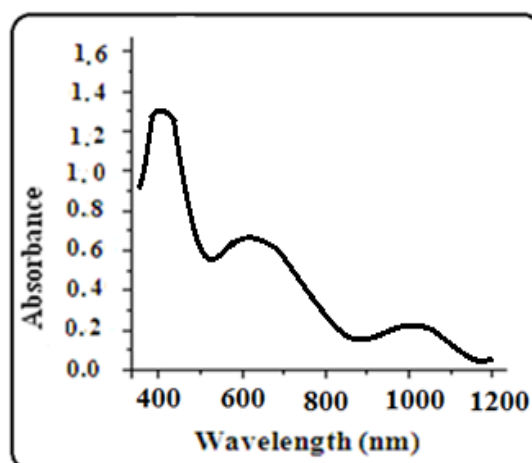

(f)

**Figure S5:** (a) Electronic spectrum of HL<sub>1</sub>; (b) Electronic spectrum of HL<sub>2</sub>; (c) Electronic spectrum of HL<sub>3</sub>; (d) Electronic spectrum of C<sub>1</sub>; (e) Electronic spectrum of C<sub>2</sub> and (f) Electronic spectrum of C<sub>3</sub>.

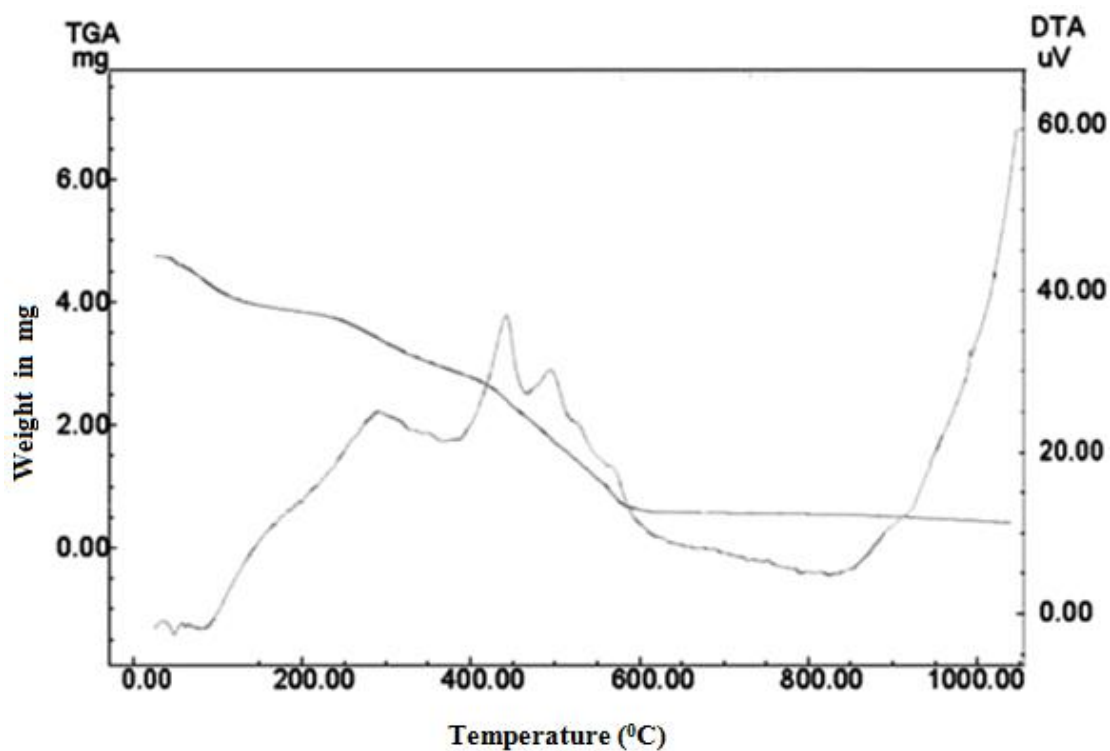

**Figure S6:** TGA/DTA thermogram of complex C<sub>3</sub>.

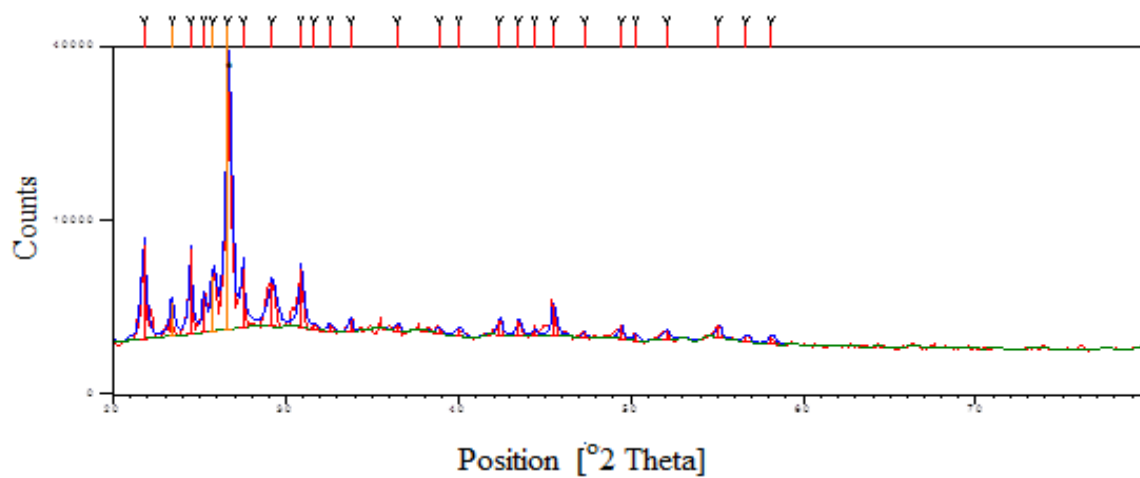

(a)

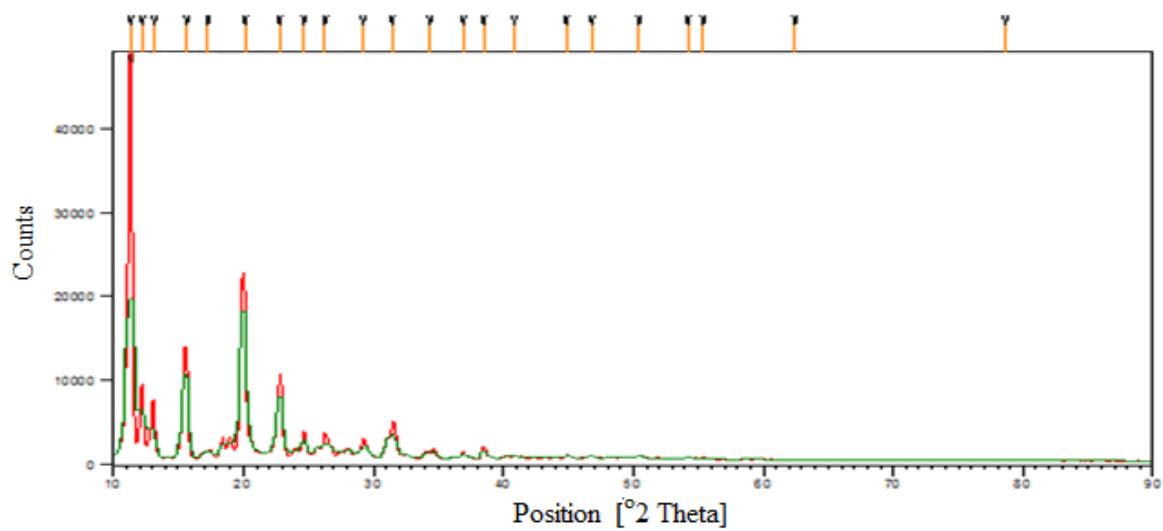

(b)

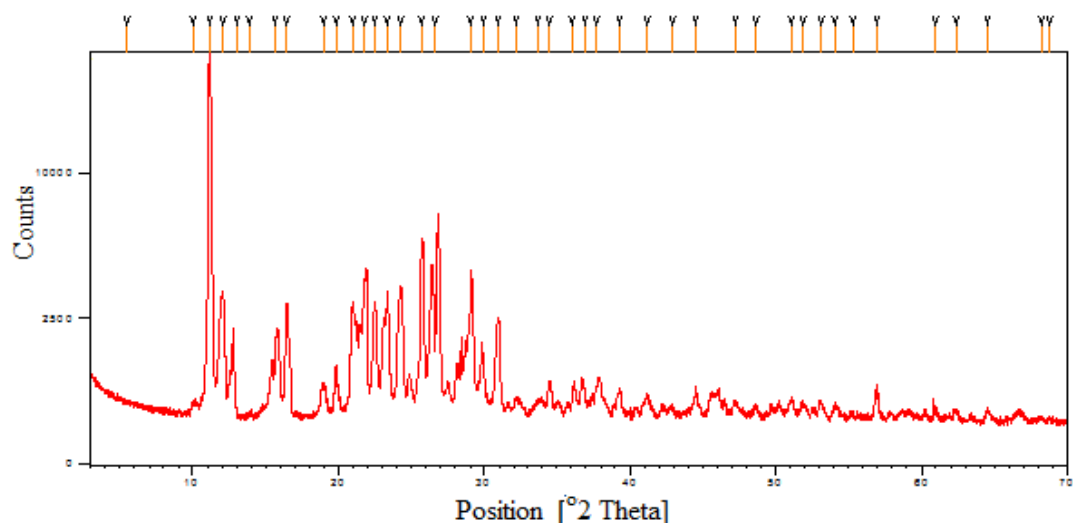

(c)

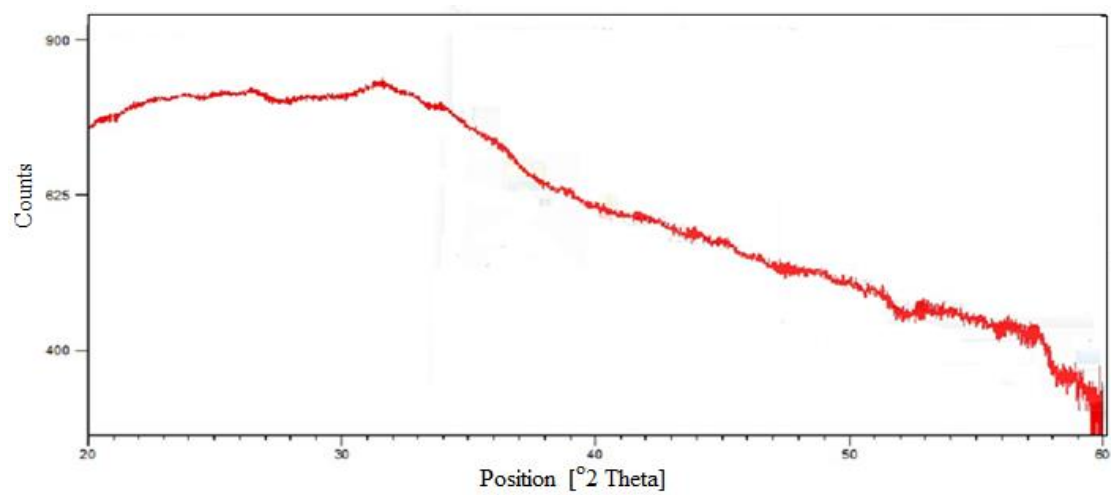

(d)

**Figure S7.** X-ray diffractogram of (a) HL<sub>1</sub> (b) HL<sub>2</sub>, (c) HL<sub>3</sub> and (d) C<sub>3</sub>.



**Table S1:** XRD data of HL<sub>1</sub>.

| <b>Pos.</b><br>[°2Th.] | <b>Height</b><br>[cts] | <b>FWHM</b><br>[°2Th.] | <b>d-spacing</b><br>[Å] | <b>Rel. Int.</b><br>[%] | <b>hkl</b> |
|------------------------|------------------------|------------------------|-------------------------|-------------------------|------------|
| 21.7677                | 6477.85                | 0.2922                 | 4.08292                 | 16.87                   | 020        |
| 24.4578                | 5927.24                | 0.1948                 | 3.63961                 | 15.44                   | 220        |
| 25.2393                | 1805.91                | 0.1948                 | 3.52865                 | 4.70                    | 011        |
| 26.6576                | 38391.45               | 0.2922                 | 3.34404                 | 100                     | 210        |
| 27.5059                | 3839.91                | 0.1948                 | 3.24280                 | 10.00                   | 211        |
| 29.1995                | 2666.54                | 0.4871                 | 3.05847                 | 6.95                    | 510        |
| 30.8622                | 3803.80                | 0.2922                 | 2.89737                 | 9.91                    | 420        |
| 45.5015                | 1526.86                | 0.2922                 | 1.99350                 | 3.98                    | 240        |
| 47.2986                | 207.64                 | 0.2922                 | 1.92186                 | 0.54                    | 202        |

**Table S2:** XRD data of HL<sub>2</sub>.

| <b>Pos.</b><br>[°2Th.] | <b>Height</b><br>[cts] | <b>FWHM</b><br>[°2Th.] | <b>d-spacing</b><br>[Å] | <b>Rel. Int.</b><br>[%] | <b>hkl</b> |
|------------------------|------------------------|------------------------|-------------------------|-------------------------|------------|
| 11.1580                | 15275.28               | 0.3149                 | 7.92995                 | 100.00                  | 001        |
| 12.0700                | 1314.23                | 0.0010                 | 7.33276                 | 8.60                    | 011        |
| 16.4200                | 1937.85                | 0.0943                 | 5.39865                 | 12.69                   | 030        |
| 20.9880                | 2481.63                | 0.3149                 | 4.23283                 | 16.25                   | 211        |
| 21.7356                | 2860.19                | 0.3149                 | 4.08890                 | 18.72                   | 131        |
| 22.4800                | 1962.72                | 0.0010                 | 3.95516                 | 12.85                   | 002        |
| 23.2793                | 2452.45                | 0.3149                 | 3.82114                 | 16.06                   | 012        |
| 24.2507                | 2841.35                | 0.3149                 | 3.67024                 | 18.60                   | 102        |
| 25.6726                | 4018.52                | 0.3149                 | 3.47009                 | 26.31                   | 310        |
| 29.0414                | 2689.69                | 0.3149                 | 3.07477                 | 17.61                   | 150        |
| 30.9177                | 2071.70                | 0.3149                 | 2.89232                 | 13.56                   | 151        |

**Table S3:** XRD data of HL<sub>3</sub>.

| <b>Po Pos.</b><br>[°2Th.] | <b>Height</b><br>[cts] | <b>FWHM</b><br>[°2Th.] | <b>d-spacing</b><br>[Å] | <b>Rel. Int.</b><br>[%] | <b>hkl</b> |
|---------------------------|------------------------|------------------------|-------------------------|-------------------------|------------|
| 11.3588                   | 17760.32               | 0.6298                 | 7.79024                 | 100                     | 120        |
| 12.2408                   | 6121.45                | 0.0253                 | 7.23094                 | 34.47                   | 001        |
| 13.18                     | 6790.74                | 0.001                  | 6.7176                  | 38.24                   | 210        |
| 15.66                     | 28.82                  | 0.001                  | 5.65891                 | 40.21                   | 130        |
| 20.18                     | 1273.39                | 0.001                  | 4.40045                 | 56.05                   | 140        |
| 22.773                    | 482.7                  | 0.6298                 | 3.90493                 | 7.17                    | 041        |
| 24.72                     | 603.55                 | 0.6298                 | 3.60161                 | 2.72                    | 400        |
| 26.2905                   | 424.25                 | 0.6298                 | 3.38992                 | 3.4                     | 022        |
| 29.2493                   | 1180.99                | 0.6298                 | 3.05338                 | 2.39                    | 022        |
| 31.4763                   | 1                      | 0.7872                 | 2.84225                 | 6.65                    | 061        |
| 38.48                     | 95.94                  | 0.0575                 | 2.33953                 | 7.62                    | 460        |

**Table S4:** XRD data of C<sub>3</sub>.

| <b>Pos.</b><br>[°2Th.] | <b>Height</b><br>[cts] | <b>FWHM</b><br>[°2Th.] | <b>d-spacing</b><br>[Å] | <b>Rel. Int.</b><br>[%] | <b>hkl</b> |
|------------------------|------------------------|------------------------|-------------------------|-------------------------|------------|
| 6.6792                 | 36.38                  | 0.3149                 | 13.23405                | 7.91                    | 010        |
| 7.4380                 | 460.10                 | 0.9210                 | 11.88565                | 100.00                  | 100        |
| 9.6796                 | 14.40                  | 0.3149                 | 9.13756                 | 3.13                    | 011        |
| 12.7654                | 24.48                  | 0.3149                 | 6.93482                 | 5.32                    | 111        |
| 18.0112                | 19.31                  | 0.3149                 | 4.92515                 | 4.20                    | 211        |
| 23.7668                | 222.09                 | 0.1155                 | 3.74386                 | 48.27                   | 301        |
| 25.1495                | 12.52                  | 0.3149                 | 3.54107                 | 2.72                    | 230        |
| 28.3192                | 20.14                  | 0.3149                 | 3.15152                 | 4.38                    | 004        |
| 32.0300                | 261.97                 | 0.0010                 | 2.79437                 | 56.94                   | 204        |
| 42.0867                | 22.58                  | 0.3149                 | 2.14701                 | 4.91                    | 161        |
| 53.2203                | 14.12                  | 0.3149                 | 1.72116                 | 3.07                    | 406        |
